# Supplementary material
Source: publisher figshare collection journal article supplement (https://acs.figshare.com/ndownloader/files/25179288)
Supplement: Supplementary file 1 [file 25179288]

**Supporting Information:**

**Description of Two-particle One-hole Electronic Resonances using Orbital Stabilization Methods**

Mushir Thodika, Nathan Mackouse, and Spiridoula Matsika\*

*Department of Chemistry, Temple University, Philadelphia, PA 19122, USA*

E-mail: smatsika@temple.edu

## Active Spaces

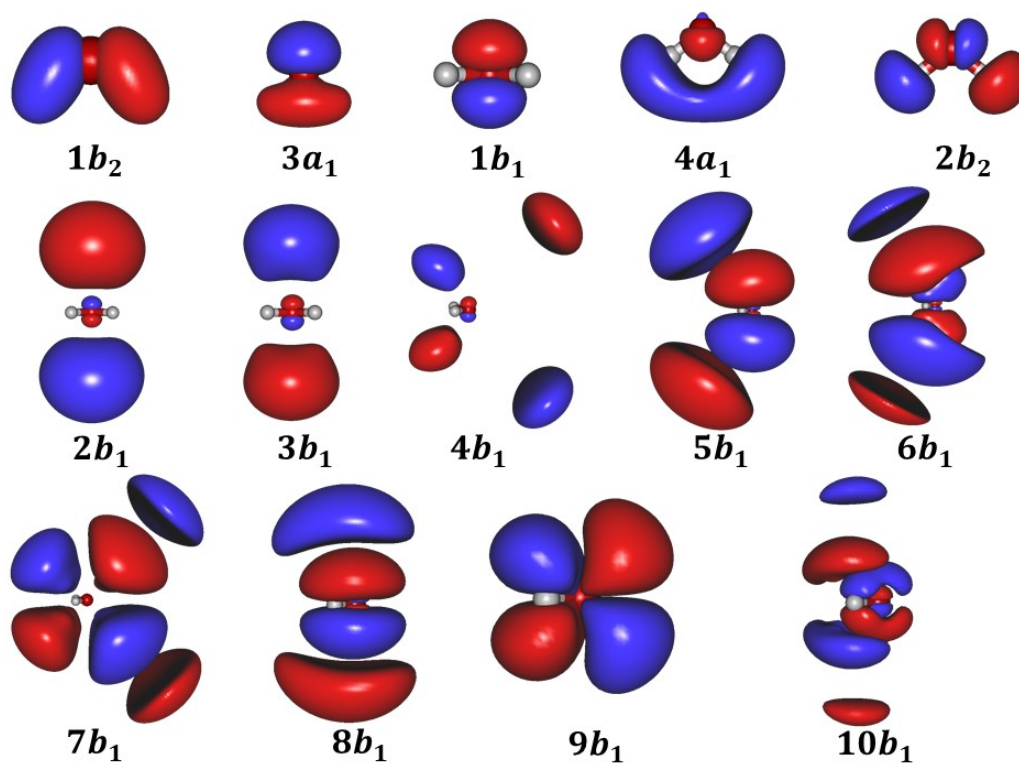

Figure S1: Active space for the RASSCF and MR-CISD calculations on the water anion. The first row contains the orbitals included in the active space (ACT) and the next two rows of diffuse orbitals are included in the auxiliary space (AUX).

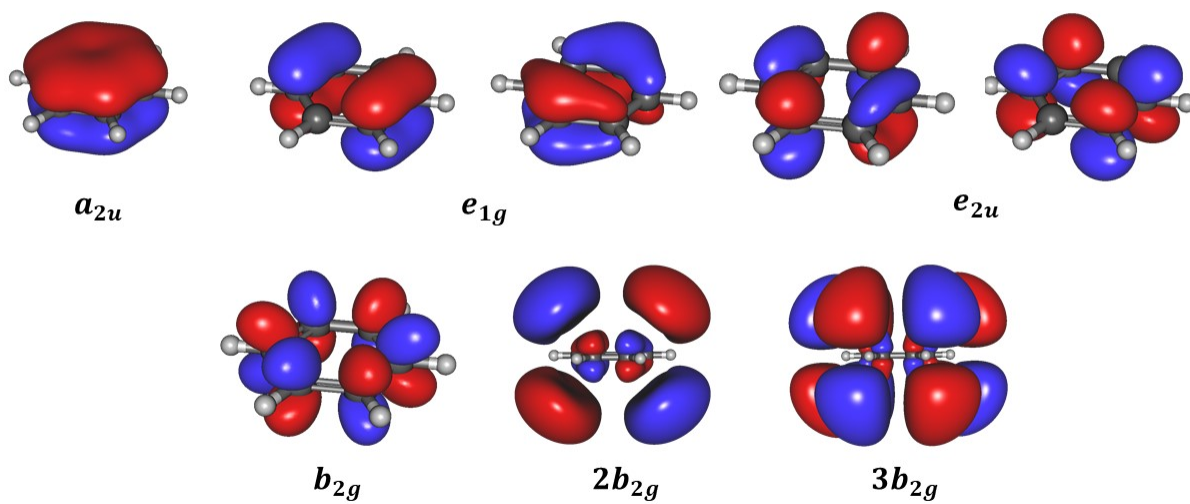

Figure S2: Active space for the RASSCF and MR-CISD calculations on the benzene anion. All the valence  $\pi$  and  $\pi^*$  orbitals are included in the active space (ACT) and the next two diffuse orbitals of the resonance symmetry are included in the auxiliary space (AUX).

## Benzene ${}^2E_{2u}$ shape resonance

Table S1: Resonance position and widths for benzene  ${}^2E_{2u}$  shape resonance obtained at the EOM-EA-CCSD/cc-pVTZ+[p] level. The energies are reported with respect to the neutral reference state.

| GPA     | $E_R(\Gamma)/\text{eV}$ |
|---------|-------------------------|
|         | shape ( ${}^2E_{2u}$ )  |
| (3,3,3) | 1.64(0.000)             |
| (4,4,4) | 1.65(0.015)             |
| (5,5,5) | 1.65(0.016)             |

## Cartesian Coordinates

Water Cartesian Coordinates (Angström)

|   |          |           |           |
|---|----------|-----------|-----------|
| O | 0.000000 | 0.000000  | 0.118243  |
| H | 0.000000 | 0.758086  | -0.472971 |
| H | 0.000000 | -0.758086 | -0.472971 |

Benzene Cartesian Coordinates (Angström)

|   |           |           |          |
|---|-----------|-----------|----------|
| H | 0.000000  | 2.475082  | 0.000000 |
| C | 0.000000  | 1.393682  | 0.000000 |
| C | 1.206964  | 0.696841  | 0.000000 |
| H | 2.143484  | 1.237541  | 0.000000 |
| C | 1.206964  | -0.696841 | 0.000000 |
| H | 2.143484  | -1.237541 | 0.000000 |
| C | 0.000000  | -1.393682 | 0.000000 |
| H | 0.000000  | -2.475082 | 0.000000 |
| C | -1.206964 | -0.696841 | 0.000000 |
| H | -2.143484 | -1.237541 | 0.000000 |
| C | -1.206964 | 0.696841  | 0.000000 |
| H | -2.143484 | 1.237541  | 0.000000 |
